# Supplementary material
Source: PubMed Central journal article supplement (PMC6231405)
Supplement: NIHMS1508924-supplement-2.pdf [file NIHMS1508924-supplement-2.pdf]

**Supplementary Material**  
Plots of Baseline and Follow-up Scores

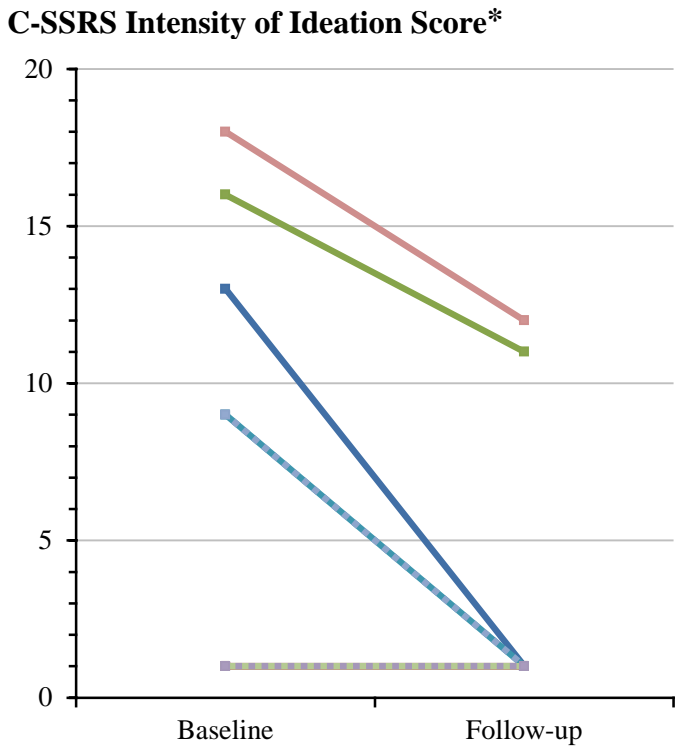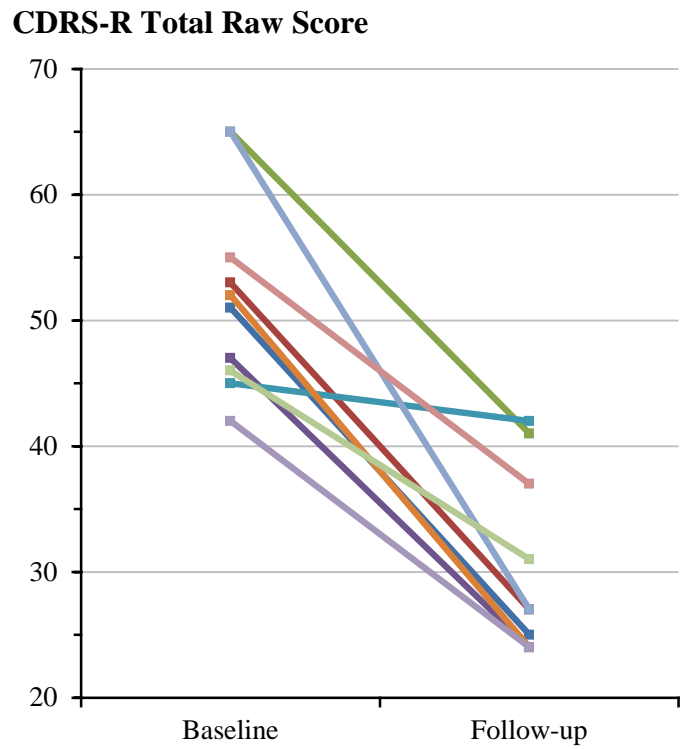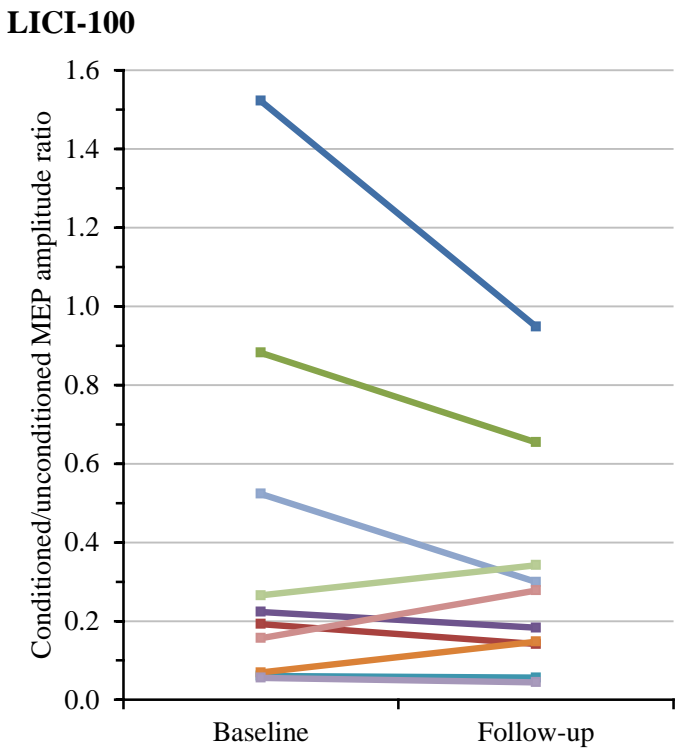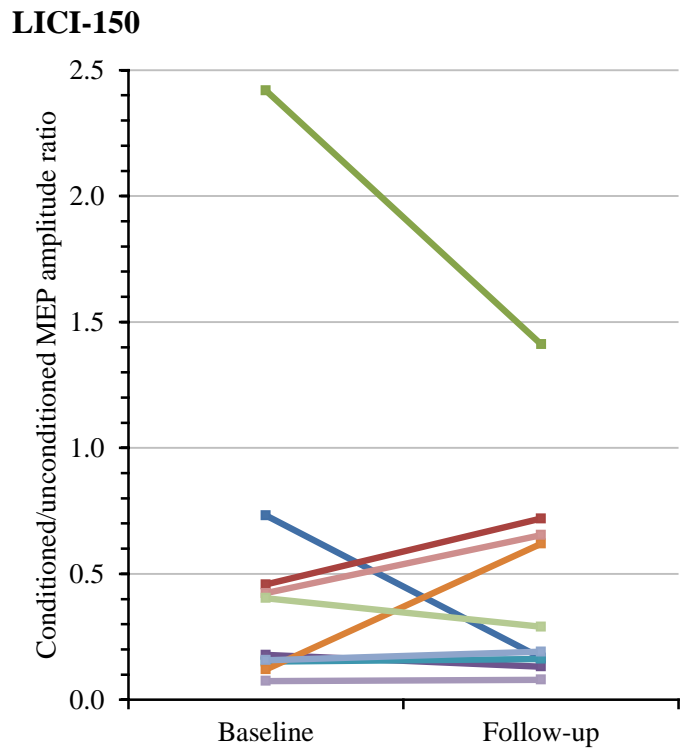

\* C-SSRS Intensity of Ideation subscale raw scores were transformed by adding 1 at both time points to enable calculation of the change score divided by the baseline score ( $\Delta$ C-SSRS). The transformed scores are displayed in this graph. Note that five participants had minimal scores of 1 at both baseline and follow-up assessments, and two participants had changes from 9 at baseline to 1 at follow-up; the lines plotting their scores thus overlap in the graph.
